# Supplementary material for: Evaluation of computational genotyping of structural variation for clinical diagnoses
Source: PubMed Central journal article supplement (PMC6732172; doi:10.1093/gigascience/giz110), 2019-09-08
Supplement: giz110_giga-d-19-00035_revision_2.pdf [file giz110_giga-d-19-00035_revision_2.pdf]

|                                                      |                                                                                                                                                                                                                                                                                                                                                                                                                                                                                                                                                                                                                                                                                                                                                                                                                                                                                                                                                                                                                                                                                                                                                                                                                                                                                                                                                                                                                                                                                                                                                                                                                                                                                                                   |                      |
|------------------------------------------------------|-------------------------------------------------------------------------------------------------------------------------------------------------------------------------------------------------------------------------------------------------------------------------------------------------------------------------------------------------------------------------------------------------------------------------------------------------------------------------------------------------------------------------------------------------------------------------------------------------------------------------------------------------------------------------------------------------------------------------------------------------------------------------------------------------------------------------------------------------------------------------------------------------------------------------------------------------------------------------------------------------------------------------------------------------------------------------------------------------------------------------------------------------------------------------------------------------------------------------------------------------------------------------------------------------------------------------------------------------------------------------------------------------------------------------------------------------------------------------------------------------------------------------------------------------------------------------------------------------------------------------------------------------------------------------------------------------------------------|----------------------|
| <b>Manuscript Number:</b>                            | GIGA-D-19-00035R2                                                                                                                                                                                                                                                                                                                                                                                                                                                                                                                                                                                                                                                                                                                                                                                                                                                                                                                                                                                                                                                                                                                                                                                                                                                                                                                                                                                                                                                                                                                                                                                                                                                                                                 |                      |
| <b>Full Title:</b>                                   | Evaluation of computational genotyping of Structural Variations for clinical diagnoses                                                                                                                                                                                                                                                                                                                                                                                                                                                                                                                                                                                                                                                                                                                                                                                                                                                                                                                                                                                                                                                                                                                                                                                                                                                                                                                                                                                                                                                                                                                                                                                                                            |                      |
| <b>Article Type:</b>                                 | Research                                                                                                                                                                                                                                                                                                                                                                                                                                                                                                                                                                                                                                                                                                                                                                                                                                                                                                                                                                                                                                                                                                                                                                                                                                                                                                                                                                                                                                                                                                                                                                                                                                                                                                          |                      |
| <b>Funding Information:</b>                          | National Human Genome Research Institute (UM1 HG008898)                                                                                                                                                                                                                                                                                                                                                                                                                                                                                                                                                                                                                                                                                                                                                                                                                                                                                                                                                                                                                                                                                                                                                                                                                                                                                                                                                                                                                                                                                                                                                                                                                                                           | Dr. Richard A. Gibbs |
| <b>Abstract:</b>                                     | <p><b>Background:</b><br/>           In recent years, Structural Variation (SV) has been identified as having a pivotal role in causing genetic disease. The discovery of SVs based on short DNA sequence reads from next-generation DNA sequence methods is error-prone, suffering from low sensitivity and high false discovery. These shortcomings can be partially overcome with extensive orthogonal validation methods, or use of long reads, but currently the cost of either precludes their application for routine clinical diagnostics. In contrast, SV genotyping of known sites of SV occurrence is relatively robust. Structural Variant genotyping therefore offers a cost-effective clinical diagnostic tool, with potentially few false positives and low occurrence of false negatives, even when applied to short-read DNA sequence data.</p> <p><b>Results:</b><br/>           We assess five state-of-the-art SV genotyping software methods, applied to short read sequence data. The methods are characterized based on their ability to genotype different SV types, spanning different size ranges. Furthermore, we analyze their ability to parse different VCF file sub-formats and assess their reliance on specific metadata. We compare the SV genotyping methods across a range of simulated and real data including SVs that were not found with Illumina data alone. We assess sensitivity and the ability to filter initial false discovery calls.</p> <p><b>Conclusion:</b><br/>           Our results indicate that, although SV genotyping software methods have superior performance to SV callers, there are limitations that suggest the need for further innovation.</p> |                      |
| <b>Corresponding Author:</b>                         | Fritz Sedlazeck<br><br>UNITED STATES                                                                                                                                                                                                                                                                                                                                                                                                                                                                                                                                                                                                                                                                                                                                                                                                                                                                                                                                                                                                                                                                                                                                                                                                                                                                                                                                                                                                                                                                                                                                                                                                                                                                              |                      |
| <b>Corresponding Author Secondary Information:</b>   |                                                                                                                                                                                                                                                                                                                                                                                                                                                                                                                                                                                                                                                                                                                                                                                                                                                                                                                                                                                                                                                                                                                                                                                                                                                                                                                                                                                                                                                                                                                                                                                                                                                                                                                   |                      |
| <b>Corresponding Author's Institution:</b>           |                                                                                                                                                                                                                                                                                                                                                                                                                                                                                                                                                                                                                                                                                                                                                                                                                                                                                                                                                                                                                                                                                                                                                                                                                                                                                                                                                                                                                                                                                                                                                                                                                                                                                                                   |                      |
| <b>Corresponding Author's Secondary Institution:</b> |                                                                                                                                                                                                                                                                                                                                                                                                                                                                                                                                                                                                                                                                                                                                                                                                                                                                                                                                                                                                                                                                                                                                                                                                                                                                                                                                                                                                                                                                                                                                                                                                                                                                                                                   |                      |
| <b>First Author:</b>                                 | Varuna Chander                                                                                                                                                                                                                                                                                                                                                                                                                                                                                                                                                                                                                                                                                                                                                                                                                                                                                                                                                                                                                                                                                                                                                                                                                                                                                                                                                                                                                                                                                                                                                                                                                                                                                                    |                      |
| <b>First Author Secondary Information:</b>           |                                                                                                                                                                                                                                                                                                                                                                                                                                                                                                                                                                                                                                                                                                                                                                                                                                                                                                                                                                                                                                                                                                                                                                                                                                                                                                                                                                                                                                                                                                                                                                                                                                                                                                                   |                      |
| <b>Order of Authors:</b>                             | Varuna Chander<br>Richard A. Gibbs<br>Fritz J. Sedlazeck                                                                                                                                                                                                                                                                                                                                                                                                                                                                                                                                                                                                                                                                                                                                                                                                                                                                                                                                                                                                                                                                                                                                                                                                                                                                                                                                                                                                                                                                                                                                                                                                                                                          |                      |
| <b>Order of Authors Secondary Information:</b>       |                                                                                                                                                                                                                                                                                                                                                                                                                                                                                                                                                                                                                                                                                                                                                                                                                                                                                                                                                                                                                                                                                                                                                                                                                                                                                                                                                                                                                                                                                                                                                                                                                                                                                                                   |                      |
| <b>Response to Reviewers:</b>                        | We have uploaded the required information to GigaDB <a href="http://dx.doi.org/10.5524/100641">http://dx.doi.org/10.5524/100641</a> and made the requested changes in the data availability section.                                                                                                                                                                                                                                                                                                                                                                                                                                                                                                                                                                                                                                                                                                                                                                                                                                                                                                                                                                                                                                                                                                                                                                                                                                                                                                                                                                                                                                                                                                              |                      |
| <b>Additional Information:</b>                       |                                                                                                                                                                                                                                                                                                                                                                                                                                                                                                                                                                                                                                                                                                                                                                                                                                                                                                                                                                                                                                                                                                                                                                                                                                                                                                                                                                                                                                                                                                                                                                                                                                                                                                                   |                      |

| Question                                                                                                                                                                                                                                                                                                                                                                                                                                                                                                                            | Response   |
|-------------------------------------------------------------------------------------------------------------------------------------------------------------------------------------------------------------------------------------------------------------------------------------------------------------------------------------------------------------------------------------------------------------------------------------------------------------------------------------------------------------------------------------|------------|
| <p>Are you submitting this manuscript to a special series or article collection?</p>                                                                                                                                                                                                                                                                                                                                                                                                                                                | <p>No</p>  |
| <p><b>Experimental design and statistics</b></p> <p>Full details of the experimental design and statistical methods used should be given in the Methods section, as detailed in our <a href="#">Minimum Standards Reporting Checklist</a>. Information essential to interpreting the data presented should be made available in the figure legends.</p> <p>Have you included all the information requested in your manuscript?</p>                                                                                                  | <p>Yes</p> |
| <p><b>Resources</b></p> <p>A description of all resources used, including antibodies, cell lines, animals and software tools, with enough information to allow them to be uniquely identified, should be included in the Methods section. Authors are strongly encouraged to cite <a href="#">Research Resource Identifiers</a> (RRIDs) for antibodies, model organisms and tools, where possible.</p> <p>Have you included the information requested as detailed in our <a href="#">Minimum Standards Reporting Checklist</a>?</p> | <p>Yes</p> |
| <p><b>Availability of data and materials</b></p> <p>All datasets and code on which the conclusions of the paper rely must be either included in your submission or deposited in <a href="#">publicly available repositories</a> (where available and ethically appropriate), referencing such data using a unique identifier in the references and in the “Availability of Data and Materials” section of your manuscript.</p>                                                                                                      | <p>Yes</p> |

Have you have met the above requirement as detailed in our [Minimum Standards Reporting Checklist?](#)

[Click here to view linked References](#)

# 1 Evaluation of computational genotyping of Structural Variations for 2 clinical diagnoses.

3 Varuna Chander<sup>1</sup>, Richard A. Gibbs<sup>1</sup>, Fritz J. Sedlazeck<sup>1\*</sup>

4 1: Human Genome Sequencing Center, Baylor College of Medicine, One Baylor Plaza, Houston  
5 TX 77030

6

7 VC: [varuna.chander@bcm.edu](mailto:varuna.chander@bcm.edu)

8 RG: [agibbs@bcm.edu](mailto:agibbs@bcm.edu)

9 FJS: [fritz.sedlazeck@bcm.edu](mailto:fritz.sedlazeck@bcm.edu)

10 \* Correspondence: [fritz.sedlazeck@bcm.edu](mailto:fritz.sedlazeck@bcm.edu)

## 11 [Abstract](#)

### 12 **Background:**

13 In recent years, Structural Variation (SV) has been identified as having a pivotal role in causing  
14 genetic disease. The discovery of SVs based on short DNA sequence reads from next-generation  
15 DNA sequence methods is error-prone, suffering from low sensitivity and high false discovery.  
16 These shortcomings can be partially overcome with extensive orthogonal validation methods,  
17 or use of long reads, but currently the cost of either precludes their application for routine  
18 clinical diagnostics. In contrast, SV genotyping of known sites of SV occurrence is relatively  
19 robust. Structural Variant genotyping therefore offers a cost-effective clinical diagnostic tool,  
20 with potentially few false positives and low occurrence of false negatives, even when applied to  
21 short-read DNA sequence data.

22

23 **Results:**

24 We assess five state- of-the- art SV genotyping software methods, applied to short read  
25 sequence data. The methods are characterized based on their ability to genotype different SV  
26 types, spanning different size ranges. Furthermore, we analyze their ability to parse different  
27 VCF file sub-formats and assess their reliance on specific metadata. We compare the SV  
28 genotyping methods across a range of simulated and real data including SVs that were not  
29 found with Illumina data alone. We assess sensitivity and the ability to filter initial false  
30 discovery calls.

31

32 **Conclusion:**

33 Our results indicate that, although SV genotyping software methods have superior performance  
34 to SV callers, there are limitations that suggest the need for further innovation.

35

36

37 [Keywords \(3-10\)](#)

38 Structural Variations, Genotyping, clinical diagnosis, Next Generation Sequencing

39

40 [Background](#)

41 With the continuous advancement of sequencing technologies, our understanding of the  
42 importance of Structural Variation (SV) is increasing[1]. Structural Variation has a critical role in  
43 evolution[2], genetic diseases (e.g. mendelian or cancer) [2, 3] and the regulation of genes in

44 different cells and tissues[4]. Furthermore, SVs constitute a substantial proportion of the  
45 genomic differences between cell types, individuals, populations and species [1, 4-8]. Structural  
46 Variation is generally defined as 50bp or longer genomic variation and is categorized into five  
47 types: Insertions, Deletions, Duplications, Inversions and Translocations [9]. Structural Variation  
48 is most often identified by leveraging combinations of paired-end, split read signals and  
49 coverage information[8].

50  
51 Methods for the *de novo* detection of SVs are still in their infancy, with some procedures  
52 reporting high (up to 89%) levels of false discovery[7, 8, 10-12] (i.e. SVs that are inferred due to  
53 artifacts, but not truly present in the sample) and between 10% to 70% false negatives[5, 7] (i.e.  
54 missing present SVs in the samples). Although deeper DNA sequence coverage is often used to  
55 improve *de novo* discovery of SVs, for example in cancer samples [13], this alone does not solve  
56 the sensitivity and accuracy shortcomings. The performance of these methods can be improved  
57 by the use of long DNA sequence reads, however this is often not practical due to high  
58 sequencing costs [14-16]. Therefore, using short reads alone significantly hinders SV discovery  
59 for routine clinical diagnosis [17].

60  
61 An additional challenge is the interpretation of the possible functional consequences of SVs.  
62 Despite the availability of existing methods to compare SVs (e.g. SURVIVOR [5]) and to study  
63 the potential impact of SVs on genes (VCFanno [18], SURVIVOR\_ant [19]), there is still a paucity  
64 of methods to assess their allele frequency among human populations. These issues can hinder

65 routine screening for SVs and limit their proper recognition and characterization for clinical  
66 diagnoses.

67

68 The identification of SVs that have been previously identified in different samples is, in  
69 principle, easier than *de novo* detection. For known SVs it is possible to computationally detect  
70 SVs directly from short read DNA sequence data in data from individual patient samples, guided  
71 by the expected position of split reads and discordant paired reads that can confirm  
72 breakpoints. This less demanding approach reduces false discovery rates and therefore renders  
73 the methods more suitable for clinical applications. In addition, the false negative rate can be  
74 reduced as it is easier to genotype a variant than to identify a new SV. Focusing on known SVs  
75 has further the advantage, compared with *de novo* discovery of SVs, that SV databases will have  
76 likely recorded the event, together with its possible association with disease (e.g. dbVar [20]).

77

78 Here, we review the current state of SVs genotyping methods and investigate their potential for  
79 application in clinical diagnoses. In particular, we address whether these SV calling softwares ('  
80 SV genotypers') can re-identify SVs that short read *de novo* SV callers failed to identify (over  
81 GIAB [21, 22] call sets) and how they perform on initially falsely inferred SVs. We describe which  
82 SV genotypers most efficiently identify which types of SVs and the effect of SV sizes.

83

## 84 Analyses

### 85 Existing methods

86 We assessed SVs genotypers: DELLY [23], Genome STRiP [24], STIX[25], SV2 [26] and SVTyper  
87 [27]. They share a common feature in which they require a bam file of the mapped reads and a  
88 VCF file that will be genotyped for SVs as inputs. **Table 1** lists their dependencies and their  
89 ability to genotype certain types of SVs.

90  
91 Overall, they can be divided into groups that support only two SV types (e.g. Genome STRiP) up  
92 to methods that support all SV types (SVTyper and DELLY), but require specific meta-  
93 information to do so. In the following, we give a brief description of each method that we  
94 assessed. Further insights can be obtained from their respective publications or manuals.

95

| Genotyper      | Approach   | SV Type |     |     |     |         | Inputs                                 | Dependencies           |
|----------------|------------|---------|-----|-----|-----|---------|----------------------------------------|------------------------|
|                |            | Del     | Ins | Inv | Dup | TRA/BND |                                        |                        |
| <b>Delly</b>   | RD, PR, SR | ✓       |     | *   | *   | *       | BAM, VCF, Ref                          | Bcftools [28]          |
| <b>Svtyper</b> | SR, PR     | ✓       |     | ✓   | ✓   | *       | BAM, VCF, Ref                          |                        |
| <b>SV2</b>     | RD, PR, SR | ✓       |     |     | ✓   |         | BAM, SNV VCF,<br>VCF, Ref, PED<br>file |                        |
| <b>STIX</b>    | PR,SR      | ✓       |     | ✓   |     |         | BAM<br>compressed,                     | Excord, Giggie<br>[29] |



|               |            |   |  |  |   |  |                       |          |
|---------------|------------|---|--|--|---|--|-----------------------|----------|
|               |            |   |  |  |   |  | PED file, VCF,<br>Ref |          |
| <b>Genome</b> | RD, PR, SR | ✓ |  |  | ✓ |  | BAM, VCF, Ref         | GATK[30] |
| <b>StRiP</b>  |            |   |  |  |   |  |                       |          |

96 *Table 1: Overview of the SV genotypers assessed here and their ability to assess different SV types. ✓ : works on a*  
97 *standardized VCF file. \*: marks dependencies on specialized tags in the VCF files. RD: read depth, SR: split reads, PR: paired*  
98 *end reads*

99 DELLY[23] is originally an SV caller that includes a genotype mode to redefine multi-sample  
100 VCFs. It operates on split and paired-end reads to genotype deletions, duplications, inversions  
101 and translocations. However, for all types except the deletions, DELLY requires a sequence  
102 resolved call in its own format to be able to estimate the genotype.

103  
104 Genome STRiP[24] genotypes only deletions and duplications. The unique aspect of Genome  
105 STRiP is that it was designed to genotype multiple samples simultaneously. It requires the GATK  
106 pipeline and prepackaged reference metadata bundles.

107  
108 STIX[25], which is the most recently developed method included here, utilizes a reverse  
109 approach to the previous two examples. First, STIX extracts the discordant read pairs and split  
110 reads and generates a searchable index per sample. This index can then be queried if it  
111 supports a specific variant call. Noteworthy, STIX in the current form only provides information  
112 on how many reads support a variant rather than the genotype itself. This is done with a flag  
113 describing whether the reads are supported by a particular variant and the number of reads  
114 supporting it.

115

116 SVTyper[27] uses a Bayesian likelihood model that is based on discordant paired-end reads and  
117 split reads. It was designed to genotype deletions, duplications, inversions and translocations.  
118 For the latter, however, SVTyper requires specific ID tags provided by Lumpy[31] to complete  
119 genotyping.

120

121 SV2[26] uses a support vector machine learning to genotype deletions and duplications based  
122 on discordant paired-end, split read and coverage. Furthermore, it was the only SV genotyper  
123 assessed here that leverages SNP calls for its prediction.

124

#### 125 [Evaluation of SVs computational genotypers based on simulated data](#)

126 To first assess the performance of genotyping methods for SVs, we simulated data sets with  
127 100bp Illumina like paired-end reads. Each data set includes 20 homozygous SVs simulated for a  
128 certain SVs type (duplications, indels, inversions and translocation) and a certain size range  
129 (100bp, 250bp, 500bp, 1kbp, 2kbp, 5kbp, 10kbp, 50kbp). For each of the data sets, we called  
130 SVs using SURVIVOR[5] based on a union set of DELLY, Manta[32], Lumpy[31] calls to include  
131 true positive as well as false positive SVs calls (see methods).

132

133 We discovered only 17 false positive calls after the initial SV discovery. This low number of false  
134 positives is in contrast to reports from other studies. However, we are using here simulated  
135 data which does not take into account the complexities involved in regions of SVs and other

136 sequencing biases. Interestingly, while this simulated data set represents an ideal case, we still  
 137 missed around 17.25% of the simulated SVs.  
 138  
 139 **Supplementary Table 1** shows the results for the SV discovery set over the 32 simulated data  
 140 sets based on 640 simulated SVs on chr21 and chr22.

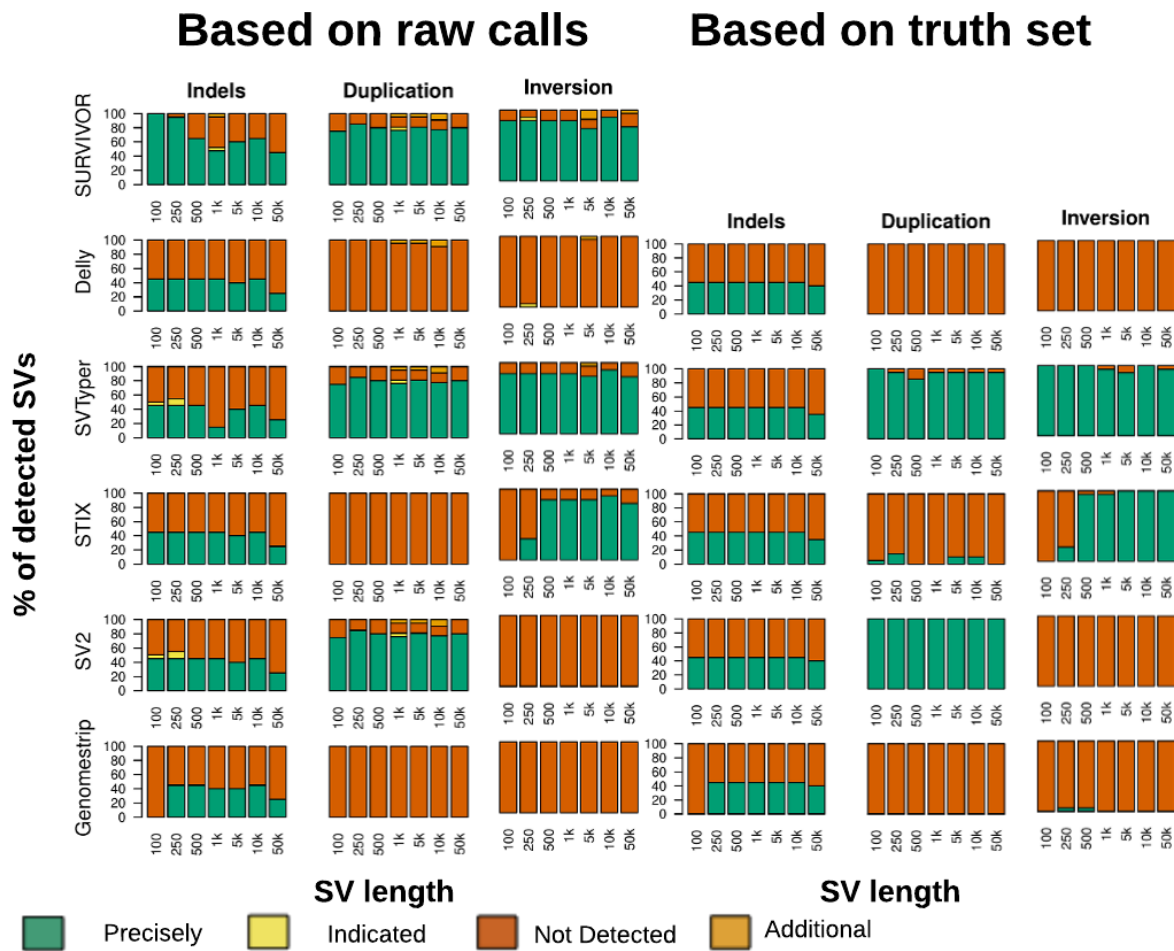

141  
 142  
 143 *Figure 1: Evaluation of Illumina like reads to assess the SV genotyper ability to re-identify insertions, deletions, duplications and*  
 144 *inversions over different size ranges (x-axis). The colors indicate the SVs being detected/ genotyped by the respective SV*  
 145 *genotypers. They were classified either precisely (green), indicated (yellow), not detected (red) or falsely identified (brown) (see*  
 146 *Methods). For the SVs genotyped based on SV calls (left) we used SURVIVOR is a union set of Delly, Lumpy and Manta to*

147 *generate the VCF file as an input for the SV genotypers. Noteworthy, Delly and SVtyper can genotype more SVs, given the*  
148 *custom information from their respective callers- Delly and SVtyper, respectively. When the truth SV set is provided as a start*  
149 *point (right side) we see marginal improvements across the SV genotyping methods while maintaining the overall trend.*

150 The generated VCF files were taken as input for the five SV genotyper callers: DELLY, Genome  
151 STRiP, SV2, STIX and SVtyper. **Figure 1** provides an overview with respect to the ability to  
152 discover SVs in the first place (SURVIVOR). We did not visualize translocations/ BND since none  
153 of the genotypers were able to identify them based upon our standard conform VCF file.

154 **Supplementary Table 1** shows the result for all SV genotypers, applied to the 32 simulated data  
155 sets.

156

157 Interestingly, we observed that certain methods require a specialized VCF file with information  
158 provided specific to one SV caller. For example, while SVtyper is able to genotype deletions,  
159 inversion and duplications, it will work on BND (translocation) events only if the ID pairs  
160 provided by Lumpy are included in the VCF file. Additionally, DELLY, which is capable to infer  
161 deletions, inversion, duplications and translocations types of SVs is only able to genotype  
162 deletions given a standardized VCF is provided without the extra information.

163

164 The overall performance of each method was evaluated based on the input VCF generated by  
165 SURVIVOR. Thus, if all of the short-read based SV callers were not able to resolve the insertions  
166 of 5kbp, then it would be assessed as a 'wrong/missed' SV.

167

168 First, we assessed the ability of the SV genotypers to correctly genotype SVs. SVtyper (64.70%)  
169 had the highest rate of correctly genotyping SVs to be present, followed by SV2 (41.57%).

170 Importantly, SV2 was able to genotype deletions and duplications, while SVTyper assessed  
171 deletions, duplications and inversions. Genome STRiP had the lowest (14.40%) success rate of  
172 all methods because it can only genotype deletions and duplications. This result was expected  
173 considering Genome STRiP was designed primarily for population-based genotyping. SVTyper  
174 improved marginally (86.26%) when BND events, which represented translocations, were  
175 ignored, followed by the next best method SV2 (83.15%) when focused on deletions and  
176 duplications. Furthermore, we also benchmarked the SV genotyping methods on their  
177 performance, given the truth set (**Supplementary Table 2**). The different methods show  
178 performance differences in the runtime ranging from 0.3 seconds (STIX) to 33.8 minutes  
179 (GenomeSTRIP) (**Supplementary Table 3**).

180

181 Next, we assessed the ability of the SV genotypers to reduce the rate at which false positives  
182 were observed, i.e. initially wrongly inferred SVs. This represents the scenario of accidentally  
183 genotyping a SV that is not represented in the sample due to sequencing or mapping biases.  
184 Over the 32 call sets, SURVIVOR had only 17 false positive calls for the simulated data. Genome  
185 STRiP performed best in filtering out all falsely detected SVs, but suffered from the lowest  
186 ability to genotype SV variations. STIX performed better as it can filter out 13 (76.4%) of the  
187 false positive SV calls. In contrast, STIX also achieved a higher (71.76%) performance for  
188 correctly identifying SVs. Although SVTyper had the highest accurately genotyped SVs, it filtered  
189 out less false positives (70.59%) obtained during the discovery phase.

190

191 In summary, we observed that none of the methods were clearly superior for correctly  
192 genotyping and correctly filtering/non-reporting SV variation. Strikingly, none of the programs  
193 were able to genotype insertions or translocations in the simulated data sets. Nevertheless,  
194 STIX and SV2 showed strong performance, with a good balance of sensitivity and being able to  
195 correctly discard false positives.

196

#### 197 [Evaluation of SVs computational genotypers based on GIAB Ashkenazy Son](#)

198 We further assessed genotyping of SVs calls based on the long-read DNA sequence data from  
199 an 'Ashkenazi Son' (HG002) reference sample. Specifically, we tested the currently released call  
200 set (v0.5.0) from GIAB, generated using sequence resolved calls from multiple technologies  
201 such as Illumina, PacBio, BioNano etc. and multiple SV callers and *de novo* assemblies based on  
202 these technologies, alone or in combination [21]. It is important to note that 8,195 of these SV  
203 calls could not be initially discovered with any Illumina assembly or caller but originated from  
204 PacBio based calls or BioNano based calling.

205 We next utilized this call set to genotype the SVs based on a 300x Illumina bam file for HG002  
206 and compare the obtained SV genotype predictions to the genotypes reported by GIAB. The  
207 first observation was that most of the SV genotypers were unable to process the VCF file  
208 provided by GIAB. We used SURVIVOR to reduce the information included in the GIAB VCF file.

209 Next, we filtered out the reported INS and complex events from this call set as most SV  
210 genotypers failed computationally to complete assessing these entries. Unfortunately, we were  
211 not able to run GenomeSTRiP successfully as it repeatedly failed, even when applied to just a  
212 subset of these calls.

213

214

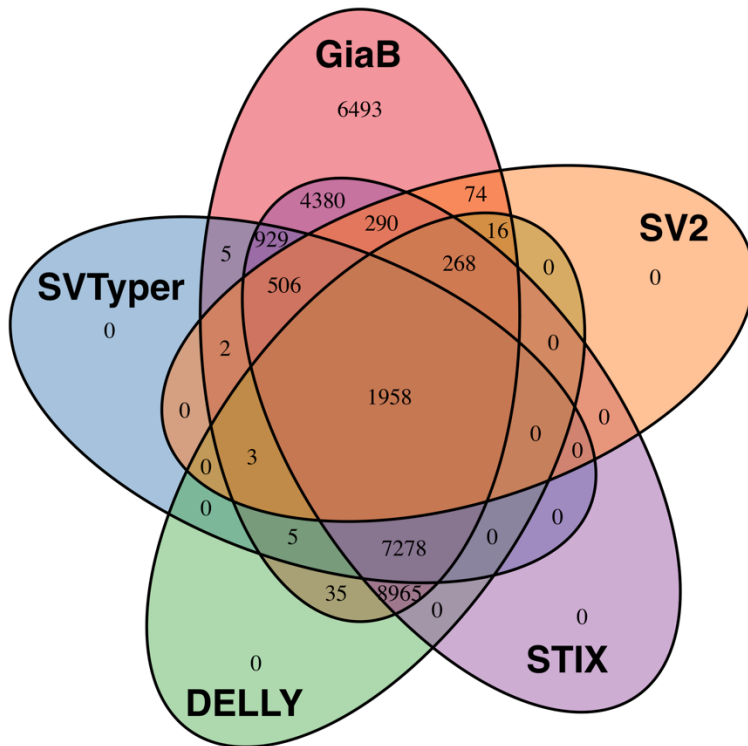

215

216 *Figure 2: Evaluation based on GIAB call set v0.5.0 deletions only.*

217

218 **Figure 2** displays the detectable deletions based on the GIAB call set (v0.5.0) per SV genotyper.

219 STIX performed the best among all methods identifying 24,574 (78.74%) of the provided

220 deletions. It is important to note that STIX does not currently report genotypes. Thus, we relied

221 only on the information if STIX found reads that support this event rather than genotype

222 information. DELLY performed as the second best identifying 18,528 (59.37%) deletions

223 followed by SVTyper (34.24%) and SV2 (9.99%). Only 6.27% of the deletion calls from GIAB call

224 set were genotyped by all SV genotype methods. Although this is a very low percent, it is

225 positive that up to 78.74% of the deletions could be successfully identified out of 62,676  
226 deletions (20bp+) in total. Noteworthy, 4921 deletions out of this set were never observed by  
227 any Illumina based caller or assembly. This highlights the potential benefit of using SV  
228 genotypers.

229

230 Next, we assessed the size ranges that SVs genotypers were able to recognize SVs. The  
231 deletions from GIAB call set 0.5.0 ranged from 20bp up to 997kbp with a median size of 36bp.  
232 All of the SV genotypers were able to identify deletions down to a size of 20bp. Interestingly we  
233 observed different median sizes of genotyped deletions, which represents the ability of specific  
234 methods to resolve small versus large events. DELLY (31bp) had the lowest median SV size  
235 followed by SVTyper (32bp), STIX (35bp) and SV2 (116bp). Furthermore, DELLY (816kbp)  
236 genotyped also the longest SVs followed by STIX (694kbp), SV2 (656kbp) and SVTyper  
237 (656kbp). See **Supplementary Table 4** for details.

238

239 When assessing the genotype concordance (see **Supplementary Table 5**), DELLY performed the  
240 best with an agreement rate of 87.08% given that it identified the variant in the first place. SV2  
241 achieved a 78.59% of genotype agreement, however it had one of the lowest recall rates  
242 (9.99%). SVTyper showed a 67.79% genotypes concordance. We did not evaluate STIX in this  
243 perspective since it does not report a genotype estimation in its current version.

244



245 In summary, STIX and DELLY performed the best in re-identifying the deletions reported by  
246 GIAB for HG0002. Furthermore, DELLY (87.08%) had also the highest agreement over the  
247 genotypes with the GIAB call set.

248

## 249 Discussion

250 In this paper, we assessed the current state of SV genotyping methods. These methods are  
251 valuable for identifying the genotype of SVs in new samples, at sites of already known validated  
252 and functionally annotated SVs. The methods are important for diagnostic applications and as  
253 they offer better accuracy and reproducibility for the clinic than *de novo* detection methods.

254

255 A significant observation was that as a practical matter, many SV genotypers are limited to  
256 applications linked to their *de novo* SV caller counterpart. For example, DELLY successfully  
257 genotyped all SV types subsequent to its use as a discovery method, but only when supplied  
258 with the DELLY-specific VCF file. Similarly, SVTyper relies on specific IDs associated to  
259 translocations (in this case BND) events provided by Lumpy.

260

261 We provided the first assessments of sensitivity and false discovery rate for SV genotypers that  
262 include not only Illumina detectable SVs, but those that could only be initially discovered via  
263 long read technologies such as PacBio or Oxford Nanopore [14, 16]. These technologies often  
264 enable the detection of more complex SVs and those within regions that are difficult to resolve  
265 by Illumina alone – but are neither scalable or accurate enough to support routine *de novo* SV  
266 identification in a clinical setting [17].

267

268 This study also identified both general and method-specific limitations of SV genotyping  
269 methods. First, we observed that none of the methods tested were able to assess novel  
270 insertions that also represent repeat expansions, which is a subclass of SVs recognized as  
271 important in cancer and other diseases. Second, most of the methods suffer from strict VCF  
272 formatting requirements, ignoring the current standards conventions, relying on individual flags  
273 that are difficult to emulate.

274

275 Among the SV genotypers, STIX performed best when applied to simulated and GIAB based SVs  
276 calls, demonstrating a good balance of high sensitivity versus reduced false discovery with the  
277 added ability to use standard VCF files. Nevertheless, the lack of genotype estimations for STIX  
278 remains a limitation. In aggregate, our results indicate SV genotypers have better performance  
279 than SV callers. Our approach can be integrated into existing analysis pipelines for routine  
280 scanning of known pathogenic SVs, representing an efficient and quick way to diagnose patients  
281 with SVs in the clinic.

282

### 283 [Potential implications](#)

284 SVs genotyping represents an opportunity to infer SVs in clinical diagnostic settings where low  
285 false discovery and false negative rates are critical. However, genotyping SVs methods seem to  
286 require additional development to improve their ability to operate on different size events and  
287 on all types of SVs (including insertions). Here we presented an overview of the current state-  
288 of-the-art methods, and highlight the need for specific methodological improvements.

289

## 290 [Methods](#)

### 291 [Simulated datasets](#)

292 We simulated 20 SVs per dataset each for a certain type (indel, inversions, duplication and  
293 translocation) and a certain size (100bp, 250bp, 500bp, 1kbp, 2kbp, 5kbp, 10kbp, 50kbp) for chr  
294 21 and 22 using SURVIVOR simSV. These simulations included a 1% SNP rate. After the  
295 simulation of the sample genomes we simulated reads using Mason [33] with the following  
296 parameter “Illumina -ll 500 -n 100 -N 39773784 -sq -mp -rn 2 “ to generate 100bp paired-end  
297 Illumina like reads. The reads were mapped with BWA MEM[34] using the -M option to mark  
298 duplicated reads to the entire genome (GRCh38-2.1.0). Subsequently, we ran Manta (v1.2.1),  
299 DELLY (v0.7.8) and Lumpy (v0.2.13) to call SVs over the simulated datasets. For each data set  
300 we generated a union call set based on all 3 callers using SURVIVOR merge (v1.0.3) allowing  
301 1kbp distance and allowing only the same SV type to be merged. To assess the performance of  
302 the SV genotypers across the SV truth set, we used the output of SURVIVOR which was used for  
303 the evaluation. Subsequently, we converted that output to a VCF file using SURVIVOR bed2vcf.  
304 We incorporated CPOS and CIEND with both 0,0 to enable running SVTyper.

305

306 This union set, as well as the SV genotyper output, was evaluated with SURVIVOR eval for the  
307 following categories:

308 Precise: calling an SVs within 10bp and inferring the correct type. Indicated: allowing a  
309 maximum of 1kbp between the simulated and the called breakpoints and ignoring the  
310 predicted type of SVs. Missing: a simulated SVs but not re identified. Additional: a SVs that was

311 called, but not simulated. The results were summarized using a custom R script operating on  
312 the output of SURVIVOR available on request.

313 The runtime of each method was measured across all simulated data set using Linux time and  
314 the average CPU time was reported.

#### 315 [SV genotyping: simulated data](#)

316 For genotyping the simulated data set, we used the union call VCF based on the SURVIVOR  
317 output as described above. We used DELLY (v0.7.8) specifying the output (-o), the vcf to be  
318 genotyped (-v) and the reference file (-g) as fasta and the bam file. We ran DELLY with the VCF  
319 file from SURVIVOR over the SV discovery caller. The obtained output from DELLY was  
320 converted using bcftools view (v1.7 (using htslib 1.7)) [28] to obtain a VCF file and was filtered  
321 to ignore genotyped calls with 0/0. SVTyper (v0.1.4) was used on the VCF generated from  
322 SURVIVOR based on the discovery phase. We filtered the obtained VCF for genotypes that could  
323 not have been accessed by SVTyper. SV2 (version 1.4.3) was run on the SURVIVOR generated  
324 VCF file for SVs genotyping but required also a SNV file. We generated this SNV file using  
325 Freebayes (v1.1.0-46-g8d2b3a0-dirty) [35] with the default parameters. The resulting SNV file  
326 from Freebayes was compressed and indexed by bgzip and tabix -p vcf [36], respectively. SV2  
327 report their result in three folders (sv2\_preprocessed, sv2\_features and sv2\_genotypes) from  
328 which we used the result reported in sv2\_genotypes to benchmark the method. Genome  
329 STRIP(v2.00.1774) was used following the suggested parameters and the VCF file generated by  
330 SURVIVOR. STIX (early version available over GitHub on April 6<sup>th</sup> 2018) was used to index the  
331 bam file using giggle (v0.6.3) [29], excord (v0.2.2) and samtools (v1.7) [28] following the  
332 suggested pipeline. Next, we run STIX with “-s 500” on the VCF files from SURVIVOR and

333 ignoring output VCF entries with "STIX\_ZERO=1", which filters out entries where STIX does not  
334 find any evidence for the SV.

335

### 336 [SV genotyping: GIAB](#)

337 We obtained the GIAB SV call set (v0.5.0) [37] , the GIAB gold standard SNV calls [38] and the  
338 corresponding bam file [39] from the GIAB FTP. The SVs call set needed to be filtered and  
339 reduced for just one sample (HG002) using cat and SURVIVOR and was subsequently filtered for  
340 deletions only. We ran all SV genotyping methods like described above. Subsequently, we  
341 filtered the results for genotypes: 0/1 and 1/1 with the exception of STIX. STIX was filtered  
342 based on if it reports reads to support the SVs or not. This was necessary since STIX does  
343 currently not report genotypes. After filtering we merged all data sets together including the  
344 original VCF provided using SURVIVOR with a maximum distance of 10bp and requiring the  
345 same SV types. We analyzed these merged calls based on if the original call set reported a  
346 genotype to be heterozygous or homozygous alternative. The Venn diagram was generated  
347 based on the support vector reported by SURVIVOR and the R package Venn.diagram. The  
348 length of the SVs that were able to be genotyped were extracted using awk filtering for existing  
349 calls.

350

### 351 [Availability of data and materials](#)

352 Datasets and scripts were deposited in the GigaScience Database, GigaDB [40] . We obtained  
353 the GIAB SV call set (v0.5.0) [37] , the GIAB gold standard SNV calls [38] and the corresponding  
354 bam file [39] from the GIAB FTP.

355

356 [Declarations](#)

357 [Funding](#)

358 This research was supported by National Institutes of Health award (UM1 HG008898).

359

360 [Authors' contributions](#)

361 VC and FS performed the analysis. VC, FS and RG wrote the manuscript. FS and RG directed the

362 project.

363

364 [Ethics approval and consent to participate](#)

365 Not applicable

366

367 [Consent for publication](#)

368 Not applicable

369

370 [Competing interests](#)

371 F.J.S. has participated in PacBio and Oxford Nanopore sponsored meetings over the past few

372 years and have received travel reimbursement and honoraria for presenting at these events.

373

374 [References](#)

375

- 376 1. Weischenfeldt J, Symmons O, Spitz F and Korbel JO. Phenotypic impact of genomic  
377 structural variation: insights from and for human disease. *Nat Rev Genet.* 2013;14  
378 2:125-38. doi:10.1038/nrg3373.
- 379 2. Lupski JR. Structural variation mutagenesis of the human genome: Impact on disease  
380 and evolution. *Environ Mol Mutagen.* 2015;56 5:419-36. doi:10.1002/em.21943.
- 381 3. Macintyre G, Ylstra B and Brenton JD. Sequencing Structural Variants in Cancer for  
382 Precision Therapeutics. *Trends Genet.* 2016;32 9:530-42. doi:10.1016/j.tig.2016.07.002.
- 383 4. Consortium GT, Laboratory DA, Coordinating Center -Analysis Working G, Statistical  
384 Methods groups-Analysis Working G, Enhancing Gg, Fund NIHC, et al. Genetic effects on  
385 gene expression across human tissues. *Nature.* 2017;550 7675:204-13.  
386 doi:10.1038/nature24277.
- 387 5. Jeffares DC, Jolly C, Hoti M, Speed D, Shaw L, Rallis C, et al. Transient structural  
388 variations have strong effects on quantitative traits and reproductive isolation in fission  
389 yeast. *Nat Commun.* 2017;8:14061. doi:10.1038/ncomms14061.
- 390 6. Sebat J, Lakshmi B, Troge J, Alexander J, Young J, Lundin P, et al. Large-scale copy  
391 number polymorphism in the human genome. *Science.* 2004;305 5683:525-8.  
392 doi:10.1126/science.1098918.
- 393 7. Sudmant PH, Rausch T, Gardner EJ, Handsaker RE, Abyzov A, Huddleston J, et al. An  
394 integrated map of structural variation in 2,504 human genomes. *Nature.* 2015;526  
395 7571:75-81. doi:10.1038/nature15394.

- 396 8. Tattini L, D'Aurizio R and Magi A. Detection of Genomic Structural Variants from Next-  
397 Generation Sequencing Data. *Front Bioeng Biotechnol.* 2015;3:92.  
398 doi:10.3389/fbioe.2015.00092.
- 399 9. Alkan C, Coe BP and Eichler EE. Genome structural variation discovery and genotyping.  
400 *Nat Rev Genet.* 2011;12 5:363-76. doi:10.1038/nrg2958.
- 401 10. English AC, Salerno WJ and Reid JG. PBHoney: identifying genomic variants via long-read  
402 discordance and interrupted mapping. *BMC Bioinformatics.* 2014;15:180.  
403 doi:10.1186/1471-2105-15-180.
- 404 11. Mills RE, Walter K, Stewart C, Handsaker RE, Chen K, Alkan C, et al. Mapping copy  
405 number variation by population-scale genome sequencing. *Nature.* 2011;470 7332:59-  
406 65. doi:10.1038/nature09708.
- 407 12. Teo SM, Pawitan Y, Ku CS, Chia KS and Salim A. Statistical challenges associated with  
408 detecting copy number variations with next-generation sequencing. *Bioinformatics.*  
409 2012;28 21:2711-8. doi:10.1093/bioinformatics/bts535.
- 410 13. Nattestad M, Goodwin S, Ng K, Baslan T, Sedlazeck FJ, Rescheneder P, et al. Complex  
411 rearrangements and oncogene amplifications revealed by long-read DNA and RNA  
412 sequencing of a breast cancer cell line. *Genome Res.* 2018;28 8:1126-35.  
413 doi:10.1101/gr.231100.117.
- 414 14. Sedlazeck FJ, Rescheneder P, Smolka M, Fang H, Nattestad M, von Haeseler A, et al.  
415 Accurate detection of complex structural variations using single-molecule sequencing.  
416 *Nat Methods.* 2018; doi:10.1038/s41592-018-0001-7.



- 417 15. Goodwin S, McPherson JD and McCombie WR. Coming of age: ten years of next-  
418 generation sequencing technologies. *Nat Rev Genet.* 2016;17 6:333-51.  
419 doi:10.1038/nrg.2016.49.
- 420 16. Chaisson MJ, Huddleston J, Dennis MY, Sudmant PH, Malig M, Hormozdiari F, et al.  
421 Resolving the complexity of the human genome using single-molecule sequencing.  
422 *Nature.* 2015;517 7536:608-11. doi:10.1038/nature13907.
- 423 17. Merker JD, Wenger AM, Sneddon T, Grove M, Zappala Z, Fresard L, et al. Long-read  
424 genome sequencing identifies causal structural variation in a Mendelian disease. *Genet*  
425 *Med.* 2018;20 1:159-63. doi:10.1038/gim.2017.86.
- 426 18. Pedersen BS, Layer RM and Quinlan AR. Vcfanno: fast, flexible annotation of genetic  
427 variants. *Genome Biol.* 2016;17 1:118. doi:10.1186/s13059-016-0973-5.
- 428 19. Sedlazeck FJ, Dhroso A, Bodian DL, Paschall J, Hermes F and Zook JM. Tools for  
429 annotation and comparison of structural variation. *F1000Res.* 2017;6:1795.  
430 doi:10.12688/f1000research.12516.1.
- 431 20. Lappalainen I, Lopez J, Skipper L, Hefferon T, Spalding JD, Garner J, et al. DbVar and  
432 DGVa: public archives for genomic structural variation. *Nucleic Acids Res.* 2013;41  
433 Database issue:D936-41. doi:10.1093/nar/gks1213.
- 434 21. Zook JM, Catoe D, McDaniel J, Vang L, Spies N, Sidow A, et al. Extensive sequencing of  
435 seven human genomes to characterize benchmark reference materials. *Sci Data.*  
436 2016;3:160025. doi:10.1038/sdata.2016.25.

- 437 22. Zook JM, Hansen NF, Olson ND, Chapman LM, Mullikin JC, Xiao C, et al. A robust  
438 benchmark for germline structural variant detection. *bioRxiv*. 2019:664623.  
439 doi:10.1101/664623.
- 440 23. Rausch T, Zichner T, Schlattl A, Stutz AM, Benes V and Korbel JO. DELLY: structural  
441 variant discovery by integrated paired-end and split-read analysis. *Bioinformatics*.  
442 2012;28 18:i333-i9. doi:10.1093/bioinformatics/bts378.
- 443 24. Handsaker RE, Van Doren V, Berman JR, Genovese G, Kashin S, Boettger LM, et al. Large  
444 multiallelic copy number variations in humans. *Nat Genet*. 2015;47 3:296-303.  
445 doi:10.1038/ng.3200.
- 446 25. Layer RM: <https://github.com/ryanlayer/stix> (2018).
- 447 26. Antaki D, Brandler WM and Sebat J. SV2: accurate structural variation genotyping and  
448 de novo mutation detection from whole genomes. *Bioinformatics*. 2018;34 10:1774-7.  
449 doi:10.1093/bioinformatics/btx813.
- 450 27. Chiang C, Layer RM, Faust GG, Lindberg MR, Rose DB, Garrison EP, et al. SpeedSeq:  
451 ultra-fast personal genome analysis and interpretation. *Nat Methods*. 2015;12 10:966-8.  
452 doi:10.1038/nmeth.3505.
- 453 28. Li H. A statistical framework for SNP calling, mutation discovery, association mapping  
454 and population genetical parameter estimation from sequencing data. *Bioinformatics*.  
455 2011;27 21:2987-93. doi:10.1093/bioinformatics/btr509.
- 456 29. Layer RM, Pedersen BS, DiSera T, Marth GT, Gertz J and Quinlan AR. GIGGLE: a search  
457 engine for large-scale integrated genome analysis. *Nat Methods*. 2018;15 2:123-6.  
458 doi:10.1038/nmeth.4556.

- 459 30. McKenna A, Hanna M, Banks E, Sivachenko A, Cibulskis K, Kernysky A, et al. The  
460 Genome Analysis Toolkit: a MapReduce framework for analyzing next-generation DNA  
461 sequencing data. *Genome Res.* 2010;20 9:1297-303. doi:10.1101/gr.107524.110.
- 462 31. Layer RM, Chiang C, Quinlan AR and Hall IM. LUMPY: a probabilistic framework for  
463 structural variant discovery. *Genome Biol.* 2014;15 6:R84. doi:10.1186/gb-2014-15-6-  
464 r84.
- 465 32. Chen X, Schulz-Trieglaff O, Shaw R, Barnes B, Schlesinger F, Kallberg M, et al. Manta:  
466 rapid detection of structural variants and indels for germline and cancer sequencing  
467 applications. *Bioinformatics.* 2016;32 8:1220-2. doi:10.1093/bioinformatics/btv710.
- 468 33. Holtgrewe M. *Mason-A Read Simulator for Second Generation Sequencing Data.* 2010.  
469 Institut für Mathematik und Informatik, Freie Universität Berlin.
- 470 34. Li H. Aligning sequence reads, clone sequences and assembly contigs with BWA-MEM.  
471 ArXiv e-prints. 2013; doi: arXiv:1303.3997 [q-bio.GN].
- 472 35. Garrison E and Marth G. Haplotype-based variant detection from short-read sequencing.  
473 ArXiv e-prints. 2012.
- 474 36. Li H. Tabix: fast retrieval of sequence features from generic TAB-delimited files.  
475 *Bioinformatics.* 2011;27 5:718-9. doi:10.1093/bioinformatics/btq671.
- 476 37. GIAB: GIAB call set v0.5. [ftp://ftp-](ftp://ftp-trace.ncbi.nlm.nih.gov/giab/ftp/data/AshkenazimTrio/analysis/NIST_UnionSVs_12122017/)  
477 [trace.ncbi.nlm.nih.gov/giab/ftp/data/AshkenazimTrio/analysis/NIST\\_UnionSVs\\_1212201](ftp://ftp-trace.ncbi.nlm.nih.gov/giab/ftp/data/AshkenazimTrio/analysis/NIST_UnionSVs_12122017/)  
478 [7/](ftp://ftp-trace.ncbi.nlm.nih.gov/giab/ftp/data/AshkenazimTrio/analysis/NIST_UnionSVs_12122017/) (2018).

- 479 38. GIAB: GIAB SNV calls gold standard. [ftp://ftp-](ftp://ftp-trace.ncbi.nlm.nih.gov/giab/ftp/release/AshkenazimTrio/HG002_NA24385_son/latest/GRCh37/)  
480 [trace.ncbi.nlm.nih.gov/giab/ftp/release/AshkenazimTrio/HG002\\_NA24385\\_son/latest/G](ftp://ftp-trace.ncbi.nlm.nih.gov/giab/ftp/release/AshkenazimTrio/HG002_NA24385_son/latest/GRCh37/)  
481 [RCh37/](ftp://ftp-trace.ncbi.nlm.nih.gov/giab/ftp/release/AshkenazimTrio/HG002_NA24385_son/latest/GRCh37/) (2018).
- 482 39. GIAB: Used GIAB short read mapping [ftp://ftp-](ftp://ftp-trace.ncbi.nlm.nih.gov/giab/ftp/data/AshkenazimTrio/HG002_NA24385_son/NIST_HiSeq_HG002_Homogeneity10953946/NHGRI_Illumina300X_AJtrio_novoalign_bams/HG002_hs37d5.300x.bam)  
483 [trace.ncbi.nlm.nih.gov/giab/ftp/data/AshkenazimTrio/HG002\\_NA24385\\_son/NIST HiSe](ftp://ftp-trace.ncbi.nlm.nih.gov/giab/ftp/data/AshkenazimTrio/HG002_NA24385_son/NIST_HiSeq_HG002_Homogeneity10953946/NHGRI_Illumina300X_AJtrio_novoalign_bams/HG002_hs37d5.300x.bam)  
484 [q\\_HG002\\_Homogeneity10953946/NHGRI Illumina300X AJtrio novoalign bams/HG002](ftp://ftp-trace.ncbi.nlm.nih.gov/giab/ftp/data/AshkenazimTrio/HG002_NA24385_son/NIST_HiSeq_HG002_Homogeneity10953946/NHGRI_Illumina300X_AJtrio_novoalign_bams/HG002_hs37d5.300x.bam)  
485 [.hs37d5.300x.bam](ftp://ftp-trace.ncbi.nlm.nih.gov/giab/ftp/data/AshkenazimTrio/HG002_NA24385_son/NIST_HiSeq_HG002_Homogeneity10953946/NHGRI_Illumina300X_AJtrio_novoalign_bams/HG002_hs37d5.300x.bam).
- 486 40. Chander V, Gibbs RA and Sedlazeck FJ. Supporting data for "Evaluation of computational  
487 genotyping of Structural Variations for clinical diagnoses". GigaScience Database. 2019.  
488 <http://dx.doi.org/10.5524/100641>  
489

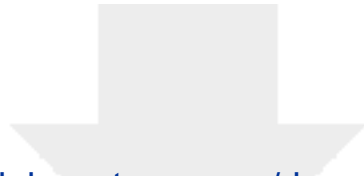

Click here to access/download  
**Supplementary Material**  
GIGA-D-19-00035\_Tables.xlsx

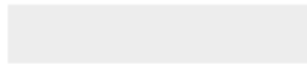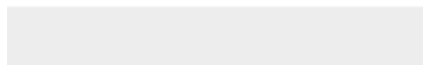

**Editor:**

A: We thank the reviewers for their helpful suggestions and for highlighting the importance of this first side-by-side assessment of SV genotyping software. We were able to incorporate all the suggestions made and performed the suggested analysis as requested. The modified text is highlighted in red in the manuscript.

**Reviewer reports:**

**Reviewer #1:** In this manuscript Chander and colleagues compare the performance of several tools that have been developed to assess the presence of a target set of structural variants in a new sample, given an aligned sequence file and VCF as input. The introduction describes the problem in sufficient detail. The authors conclude that none of the methods is clearly superior for correctly genotyping samples. Moreover, it appears that none of the methods can be endorsed as a strong overall performer, and attempting to combine the results of several tools in a voting approach may be unwise due to either lack of coverage of certain classes of SV, or requirements that VCFs be pre-processed using specific tools. Overall, the impression is of a field grappling with a difficult problem, with tools that are not yet ready for general use by non-specialists.

The manuscript is technically well-executed. The writing requires some proof-reading.

A: We thank the reviewer for his recommendations. Yes, we agree that the field is in an early stage, which asserts the importance of such benchmarks to reveal the current state and highlight what is missing.

**Major comments:**

1) Figures for the accuracy of SV calling are derived from high-quality but older citations that used low-pass sequencing that was more prevalent 6-8 years ago (e.g. Mills Nature 2011). More recent studies of SV (at least in cancer) use deeper short read sequencing (e.g. 30-100x depth). These methods are applied to non-homogenous cell populations where not all cells will harbor a given SV. **The introduction would be improved if the** authors commented briefly on 1) the trade-offs between higher sequencing depth, SV calling accuracy, and cost; and 2)

the different applications of SV genotyping in a germline vs. tumor context. These factors may influence the utility of a given tool for different applications.

A: We agree with the reviewer that recent studies focus on higher sequencing depth. We did that for our simulation study (30x) and utilized even the full 300x data set for GIAB. However, we disagree that these are outdated methods. The methods we focused here are for SV genotyping and not for the initial SV discoveries. Other publications have already presented benchmarking of the latter (e.g. Kosugi et al. 2019, PMID: 31159850; Sedlazeck et. al. 2018 and Nattestad et. al 2018, PMID: 29713083 and 29954844).

2) Table 1 should distinguish between tools that are agnostic to the SV calling tool and those such as Delly or SVTyper that require a VCF generated using a specific SV method.

A: We thank the reviewer for this suggestion and have modified the table accordingly.

3) It's not clear what lines 125-126 mean, "given the nature of the data". Please be explicit about results were expected, why they were expected, and the degree to which the observed results conformed to those expectations.

A: We have clarified that by this statement- "We discovered only 17 false positive calls after the initial SV discovery. This low number of false positives is in contrast to reports from other studies. However, we are using here simulated data which does not take into account the complexities involved in regions of SVs and other sequencing biases. Interestingly, while this simulated data set represents an ideal case we still missed around 17.25% of the simulated SVs.

" at line 133

4) The authors test whether the SV genotypers fail to call incorrectly genotyped SVs; this seems a distinct task from whether they correctly report the absence of a given SV when it is truly not present in the sample.

A: In this benchmark, we have assessed true positives (SVs that are present and should be re-found by the SV genotypers), false positives (SVs that are present in the input VCF but not present in the sample) and false negatives (SVs that are

present in the sample and in the input VCF but were not re – identified). The case where SVs are provided in the input VCF but are not supported in the sample is reflected as false positives test cases. The case where reads don't show any significant distortion in this region is trivial and thus was not explicitly assessed.

**Reviewer #2:** This study is designed to evaluate tools for the genotyping or validation of structural variant calls, with regard to their accuracy, applicability to types of structural variant, and usability. The authors make a strong case for the importance of this evaluation, due to the high false positive rates of most structural variant calling techniques that rely on short read sequencing technology and the utility of genotyping SVs, as well as counting alleles for population-level studies. SV genotypers were evaluated against a set of simulated SVs of different types, then against a set of SVs identified in a real sample through the use of many different and complementary technologies and methods by the GIAB consortium. The conclusion of this study is that while SV genotypers can be used to improve the accuracy of SV calls, they require considerable enhancement in usability and general applicability.

I like the simulation experiment, but the analysis needs to be improved. First, the figure. The axes are not labeled, and the colors are not described. The yellow and the orange are so similar, and the plots are so small that I didn't realize they were different colors until I zoomed way in. I kept getting lost in the description about which SVs are supported by which method.

A: We thank the reviewer for this suggestion. We have followed the guidelines for preparing the figures and used colors that are suggested for color blind people. The figure is meant to give a general trend showing in green/orange and red for the different performance abilities of the SV genotypers. The precise numbers are provided in Supplementary Tables.

It may be worth using some other visual cue (maybe another color) to indicated that a particular method does not work for a particular SV type, instead of just saying it genotypes 0% of the SVs. For example, SVTYPER supports BNDs but just misses all of them while GenomeSTRIP doesn't even try to genotype BNDs. That different is important and it would be helpful if it was clearer.



A: We discussed these limitations in the introduction of the manuscript and now this is also highlighted in Table 1. Figure 1 represents the ability to call certain SV types and sizes, from a standard VCF file. To clarify the presentation, we removed the BND assessment from Figure 1 since none of the methods were able to successfully provide those genotypes. In the example of SVTyper, it cannot call BND events since it requires specific input data provided only by Lumpy. For other SV types we have included tags that we could reproduce (e.g. CIPOS, CIEND) in the VCF files to enable a comparison. In contrast, GenomeSTRIP indeed only focuses on DEL/ DUP events, which is similar to SV2.

In the description, since the overall rates are so dependent on the supported SV types, it may be worth reorganizing this section around SV types instead of going through each method and given a single rate (e.g., for DEL the method A was x%, B was y% and C doesn't do DEL).

A: We have made minor modifications to the text, since we were motivated to illustrate the overall combined performance of the methods. Figure 1 already illustrates the different advantages and disadvantages of the individual methods based on the different types and size regimes.

Question on the simulation experiment. Were the events all HET?

A: The SVs were all homozygous. We have clarified this in the manuscript.

Why only test the events that were detected? I get that in a non-simulated scenario you will only test the SVs that you detect, but it would be interesting to test how/if undetected SVs can be genotyped. This is a claim that has been made from long-read sequencing and it seems you can test it here too.

A: Thank you for raising this point. We had these tests included over the GIAB data set where a multitude of SV were only detectable using long reads. We highlighted the ability of SVgenotypers to identify these events. Furthermore, in the simulation we benchmarked the case where there were false SV calls and the ability of the SV genotypers to detect these.

On line 147, I don't think you meant "filter out falsely called SVs." That part is about true positives. The next paragraph is about filtering false positives.

A: We have modified the main text to clarify this point. This was one of the points we assessed in the benchmarks. We used standard SV callers (Delly, Lumpy and Manta) over a union set to obtain SV calls over each simulated data set. This also included a 17 falsely called SVs due to mapping errors or other reasons. We used these 17 artifacts to benchmark how these SV genotypers perform over a false indication of an SV in the sample. This could, for example, represent regions that are repetitive or otherwise challenging.

In the false positive part, you say that STIX does better than SVTYPER, but the numbers given do not seem to support that. STIX filters 76.47% and SVTYPER filters 81.82%. I am guessing the 81.82 is typo since you can't get to that number with 17 as a denominator.

A: We apologize for this confusion. The numbers reported in the Supplementary table were correct. We corrected this sentence: "... Genome STRiP performed best with filtering out all falsely detected SVs, but suffers from the lowest ability to genotype SV variation. STIX performed better as it can filter out 13 (76.4 %) of the false positive SV calls. In contrast, STIX also achieved a higher (71.76%) performance for correctly identifying SVs. Although SVTyper had the highest accurately genotyped SVs, it filtered out less of the false positives (69.70%) obtained during the discovery phase."

The dependence that some methods have on particular VCF flags is interesting, but I think you should comment on if either meet the VCF spec.

A: We clarified this in the main text. The issue is that all the input VCFs conform to the expected standard, but many tools require additional flags, which are not provided by other methods and are not easily reproducible.

This study, like most which deal with SV detection methods, suffered from a lack of fully reliable positive controls. The combination of simulated data and highly vetted GIAB SV calls provide a likely best currently possible answer to that problem. The low number of false positive SV calls in the simulated data suggest that the simulation was a best-case scenario for SV calling and therefore genotyping. Testing against a curated set of known false calls from previous published work might provide a useful complementary test of how well the

genotypers handle false positives.

A: We appreciate the comment – and the recognition of the difficulty of providing a ‘gold standard’ for this kind of work. In the simulation, we focused on the SVs that are falsely called but are in regions that show mapping errors. The other cases, as suggested here, would be exemplified by an SV in an input VCF vs. non-altered mapping within specified regions. These cases are easily distinguishable by e.g. a lack of abnormally mapped reads and thus we did not assess this.

Use of the GIAB SV callset as a second test case for the genotypers is a valuable exercise and demonstrates the performance of these genotypers in real data. A mostly unavoidable source of concern is the reliability of the calls from GIAB that are used in this experiment. These calls are an attempt to sensitively identify all structural variation in the Ashkenazi Son sample and seem likely (due to the number of events) to contain a large number of false positives. This could be reflected in the number of variants that were not detected by any of the genotypers, but those could also represent real variants that genotypers could not identify. It would therefore strengthen the argument to have some additional analysis of the variants that were not identified by any genotyper, such as a downsampling and visual review. If the majority of those variants appear to be false positives in GIAB rather than false negatives in genotyping, the performance of the genotypers may potentially be much stronger than it currently appears to be.

A: We agree with the reviewer that this could have been a potential pitfall. However, the GIAB calls in v0.5 have been produced via multiple rounds of manual curation using various sequencing technologies and assembly and mapping approaches. The combined high confidence set within the high confidence regions indeed represents a highly accurate SV call set that has been assessed multiple times by us and others over various studies. Hence, we do not share this concern.

How dependent is the performance of STIX on finding just one read supporting an SV?

A: As we highlighted in the main text, it is a disadvantage of STIX to only report read counts vs. genotypes from other methods. Since this is a limitation of the method itself, we can just highlight this in the discussion as we did.

A missing piece for all of the experiments is runtime. Is one of these more efficient than the others?

A: Thank you for this suggestion. We have included the average CPU time measured over 20 runs as Supplementary Table. STIX is the fastest method (0.4 seconds) followed by Delly (3.7s) and SVtyper (9.6s). The slowest by far is GenomeSTRiP (33.8 min).
